# Supplementary material for: AKR1B1-dependent fructose metabolism enhances malignancy of cancer cells
Source: Springer Nature journal article supplement (doi:10.1038/s41418-024-01393-4), 2024-10-15
Supplement: MOESM1 [file 41418_2024_1393_MOESM1_ESM.pdf]

- 1
- 2
- 3
- 4
- 5
- 6
- 7
- 8
- 9
- 0
- 1
- 2
- 3
- 4
- 5
- 6
- 7
- 8

Qing Zhao<sup>1,7</sup>, Bing Han<sup>2,7</sup>, Lu Wang<sup>3,7</sup>, Jia Wu<sup>4</sup>, Siliang Wang<sup>4</sup>, Zhenxing Ren<sup>1</sup>, Shouli Wang<sup>1</sup>,  
Haining Yang<sup>5</sup>, Michele Carbone<sup>5</sup>, Changsheng Dong<sup>4</sup>, Gerry Melino<sup>6\*</sup>, Wen-Lian Chen<sup>4\*</sup>, Wei Jia<sup>1,3\*</sup>

<sup>2</sup>Mayo Clinic, 4500 San Pablo Rd S, Jacksonville, FL 32224, USA

<sup>4</sup>Cancer Institute, Longhua Hospital, Shanghai University of Traditional Chinese Medicine, Shanghai 200032, China

<sup>6</sup>Department of Experimental Medicine, University of Rome “Tor Vergata”, 00133, Rome, Italy

<sup>7</sup>These authors contributed equally

\*Correspondence: weijia2@hku.hk (W.J.), chenwl8412@shutcm.edu.cn (W.-L.C.), melino@uniroma2.it (G.M.)

A

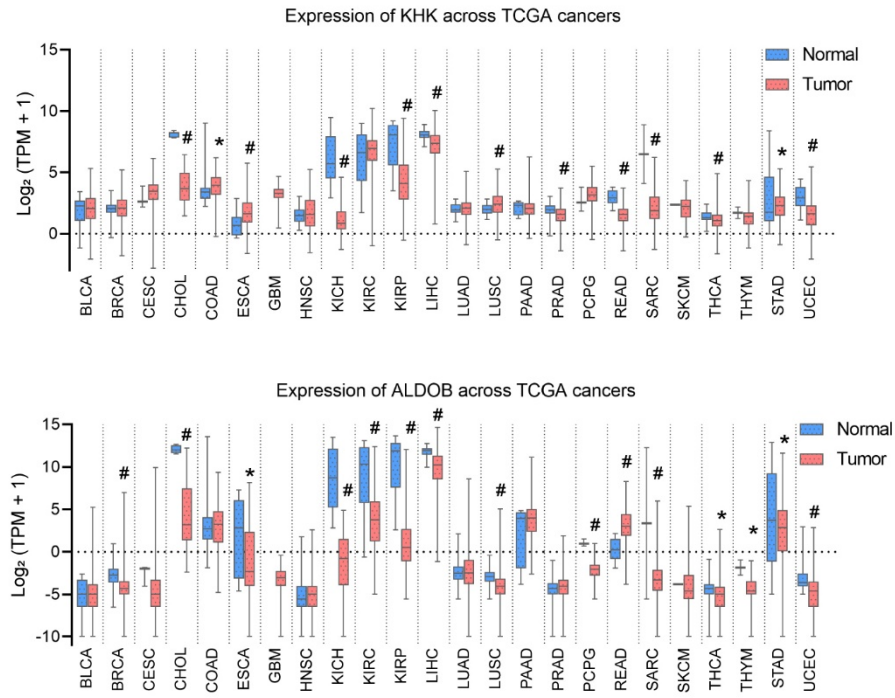

B

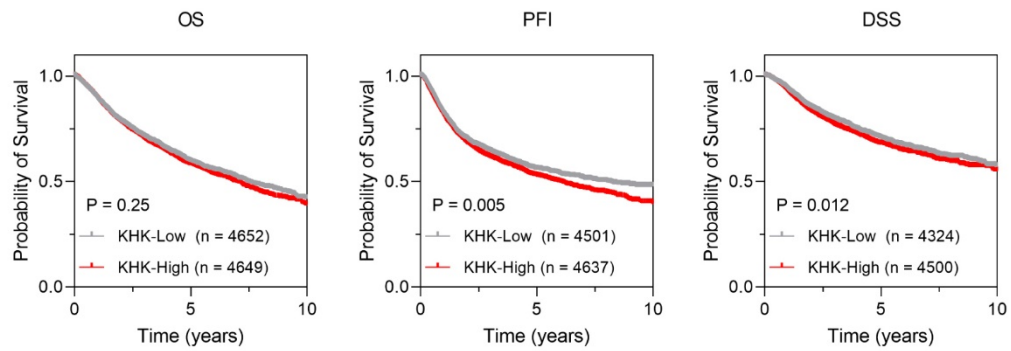

C

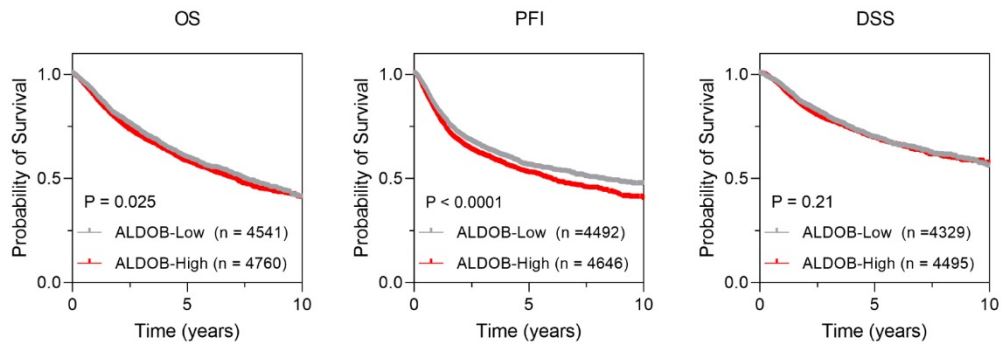

**Extended Data Fig. 1 Bioinformatics analysis for the clinical relevance of KHK and ALDOB in cancer patients derived from TCGA database.**

(A) (Upper panel) *KHK* expression in multiple cancer tissues from the TCGA database. (Lower panel) *ALDOB* expression in multiple cancer tissues from the TCGA database. \*: *t*-test  $P < 0.05$ ; #: *t*-test  $P < 0.01$ .

(B) Kaplan-Meier curves depicting OS, PFI, and DSS of pan-cancer patients from TCGA database classified by low and high *KHK* expression (RNA-seq). OS, overall survival; PFI, progression free interval; DSS, disease specific survival.

(C) Kaplan-Meier curves depicting OS, PFI, and DSS of pan-cancer patients from TCGA database classified by low and high *ALDOB* expression (RNA-seq). OS, overall survival; PFI, progression free interval; DSS, disease specific survival.

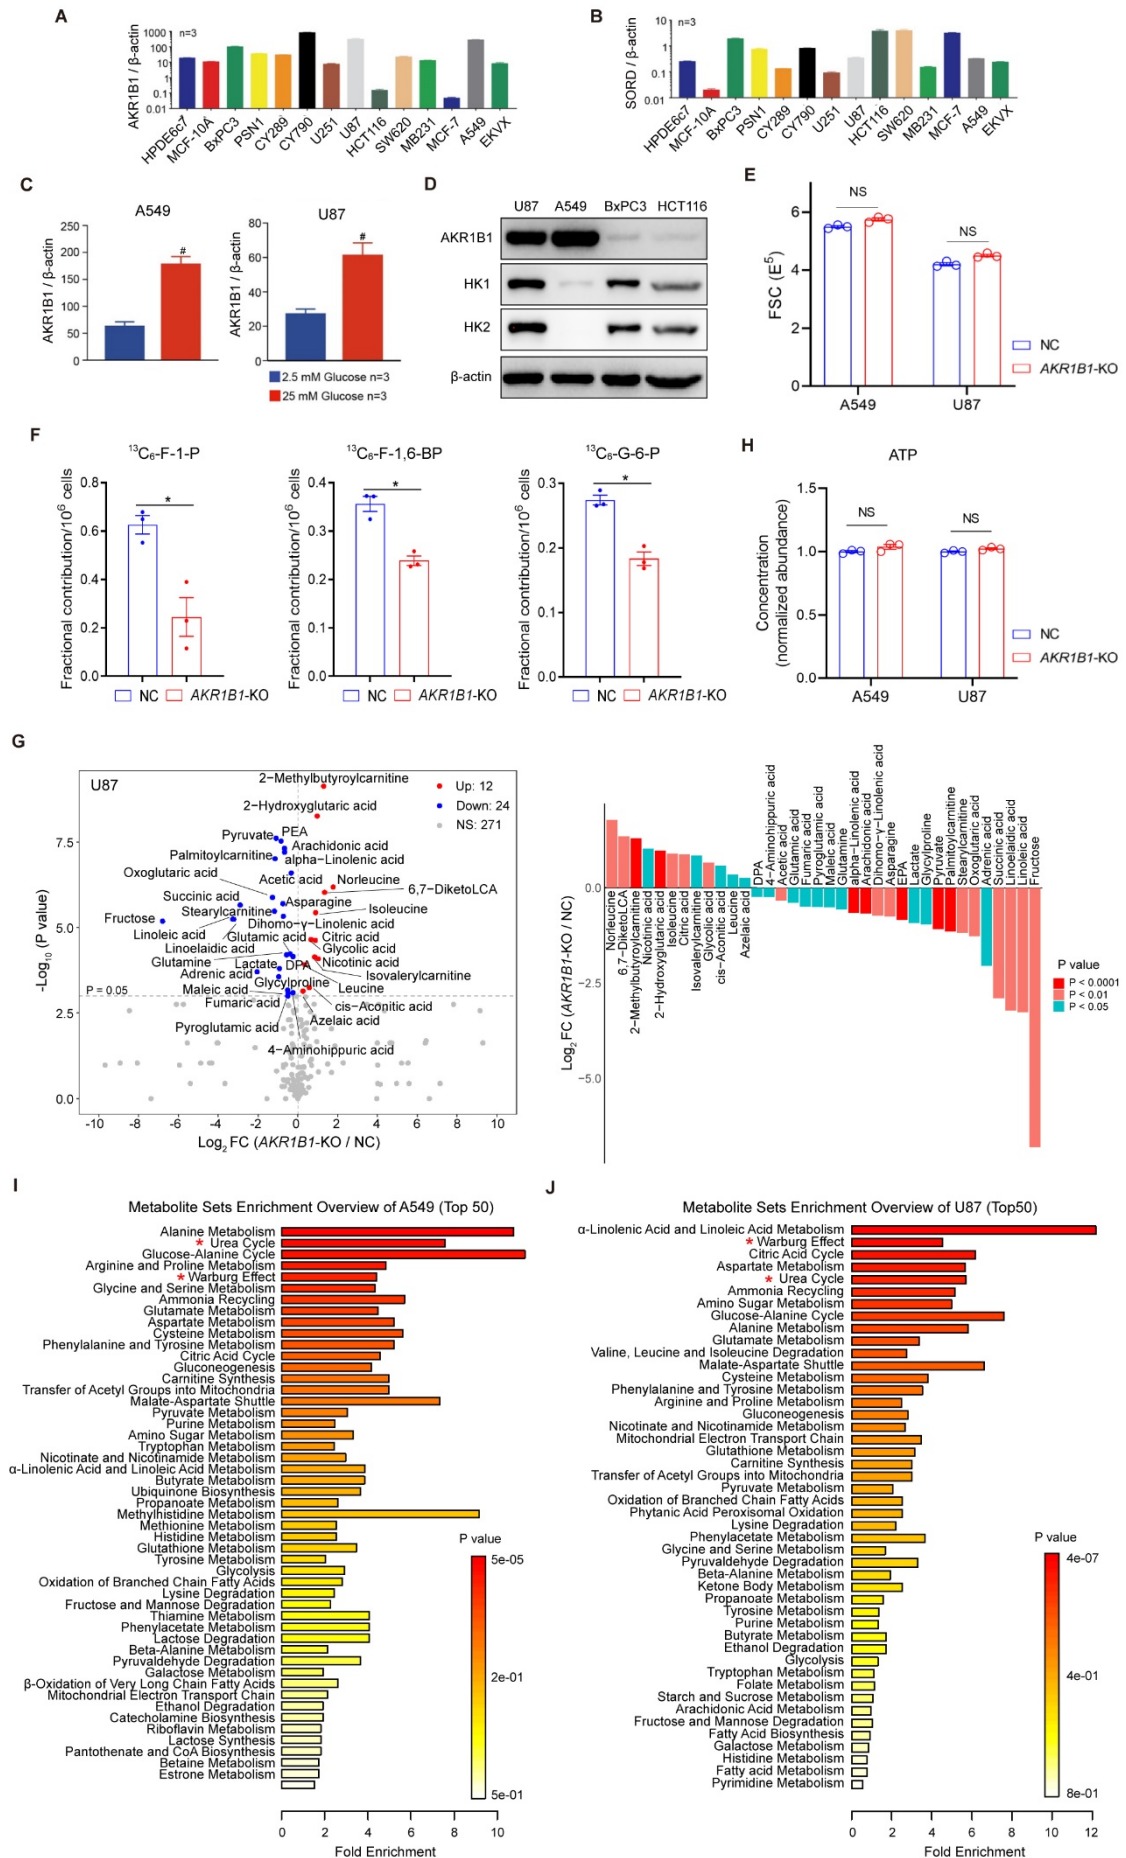

**Extended Data Fig. 2 The expression of enzymes involved in fructose- and glucose-metabolism in multiple cancer cell lines, the ATP concentrations and cell size in nontarget control (NC) and *AKR1B1*-KO cells, and metabolomics analysis of NC and *AKR1B1*-KO U87 cells.**

(A-B) Key enzymes of the polyol pathway, *AKR1B1* (A) and *SORD* (B), are widely expressed in multiple cancer cell lines at the mRNA levels (n = 3).

(C) The regulation of *AKR1B1* expression by glucose levels in different cancer cells (n = 3).

(D) The expression of *AKR1B1*, *HK1*, and *HK2* in four different cancer cells.

(E) The cell size in NC as well as *AKR1B1*-KO cells (n = 3).

(F) The amounts of glucose- and fructose-specific metabolites in *AKR1B1*-KO U87 cells. Cells were treated in glucose free DMEM containing 10% dialyzed FBS supplemented with 25 mM <sup>13</sup>C-glucose for 24 h and harvested for metabolic flux analysis (n = 3).

(G) The volcano plot showing the perturbed metabolites by *AKR1B1*-KO in U87 cells (Left panel). The bar plot displaying the differential metabolites triggered by *AKR1B1*-KO in U87 cells (Right panel). These metabolites were ranked based on their fold change values and highlighted with different colors according to their P values. FC, fold change.

(H) The ATP concentrations in NC and *AKR1B1*-KO cells (n = 3).

(I-J) Pathway enrichment analysis of differential metabolites was performed using the selected pathway-associated metabolite sets (SMPDB) library.

Data are represented as mean ± SEM. \*: *t*-test *P* < 0.05; #: *t*-test *P* < 0.01; NS: not significant.

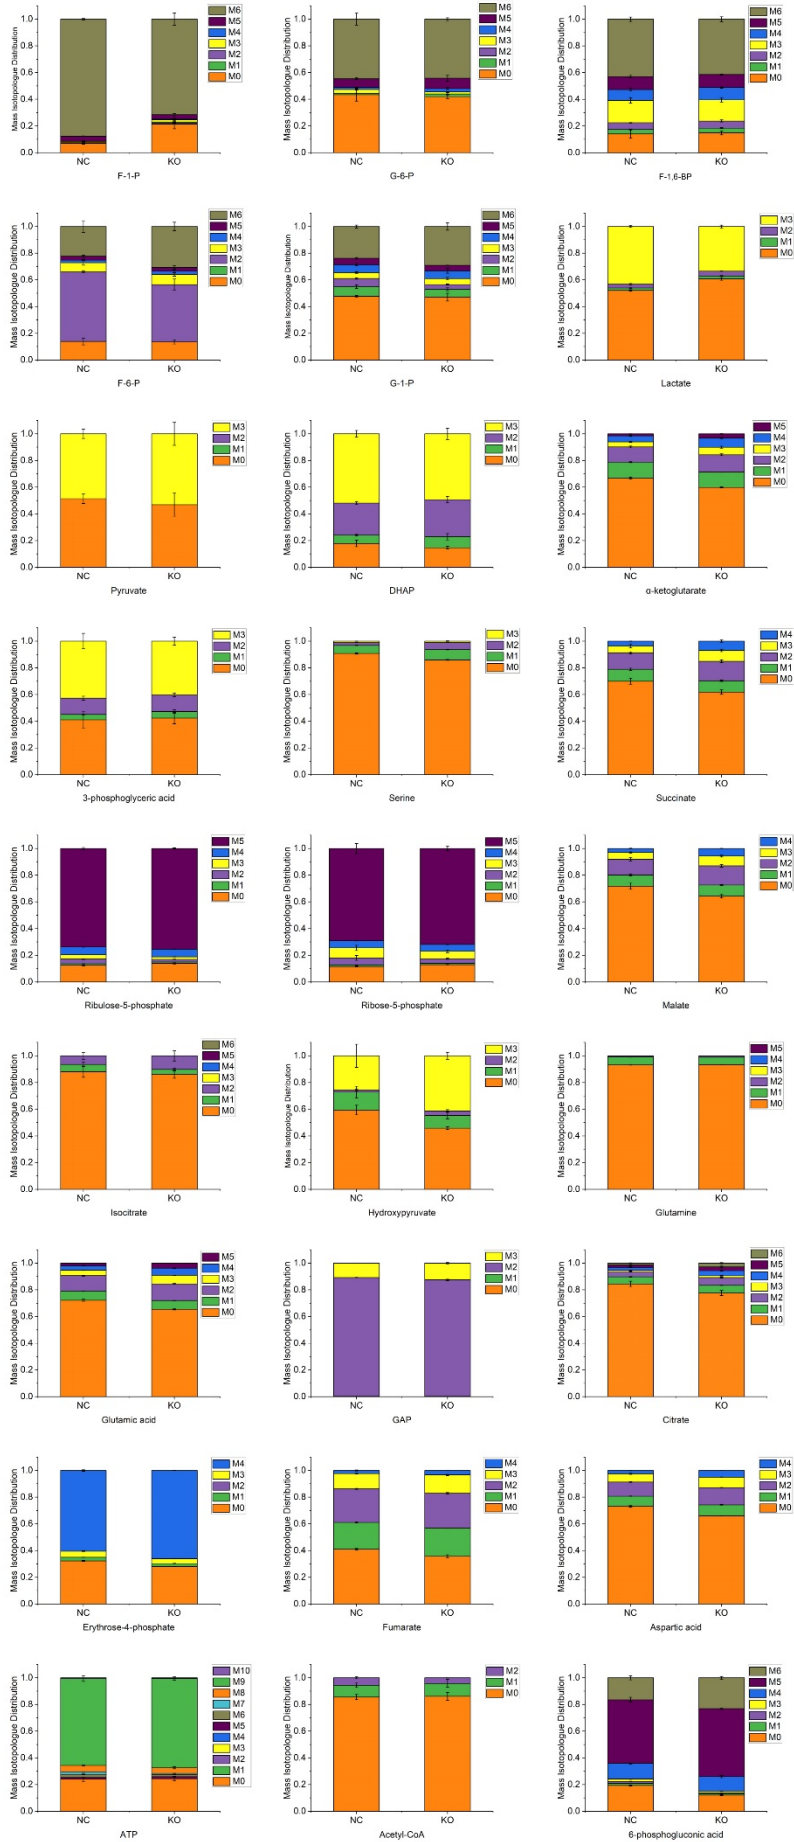

b

**Extended Data Fig. 3 Mass isotopologue distributions (MIDs) of metabolites in A549 cells**

Mass isotopologue distributions (MIDs) of metabolites in NC and *AKR1B1*-KO A549 cells were measured after 24 h culture with  $^{13}\text{C}$ -glucose (labelled at all six carbons). Data are displayed as mean  $\pm$  SD (n = 3). Glucose-1-phosphate (G-1-P), Fructose-1-phosphate (F-1-P), Fructose-6-phosphate (F-6-P), Glucose-6-phosphate (G-6-P), Fructose-1,6-bisphosphate (F-1,6-BP), Glyceraldehyde-3-phosphate (GAP), Dihydroxyacetone phosphate (DHAP).

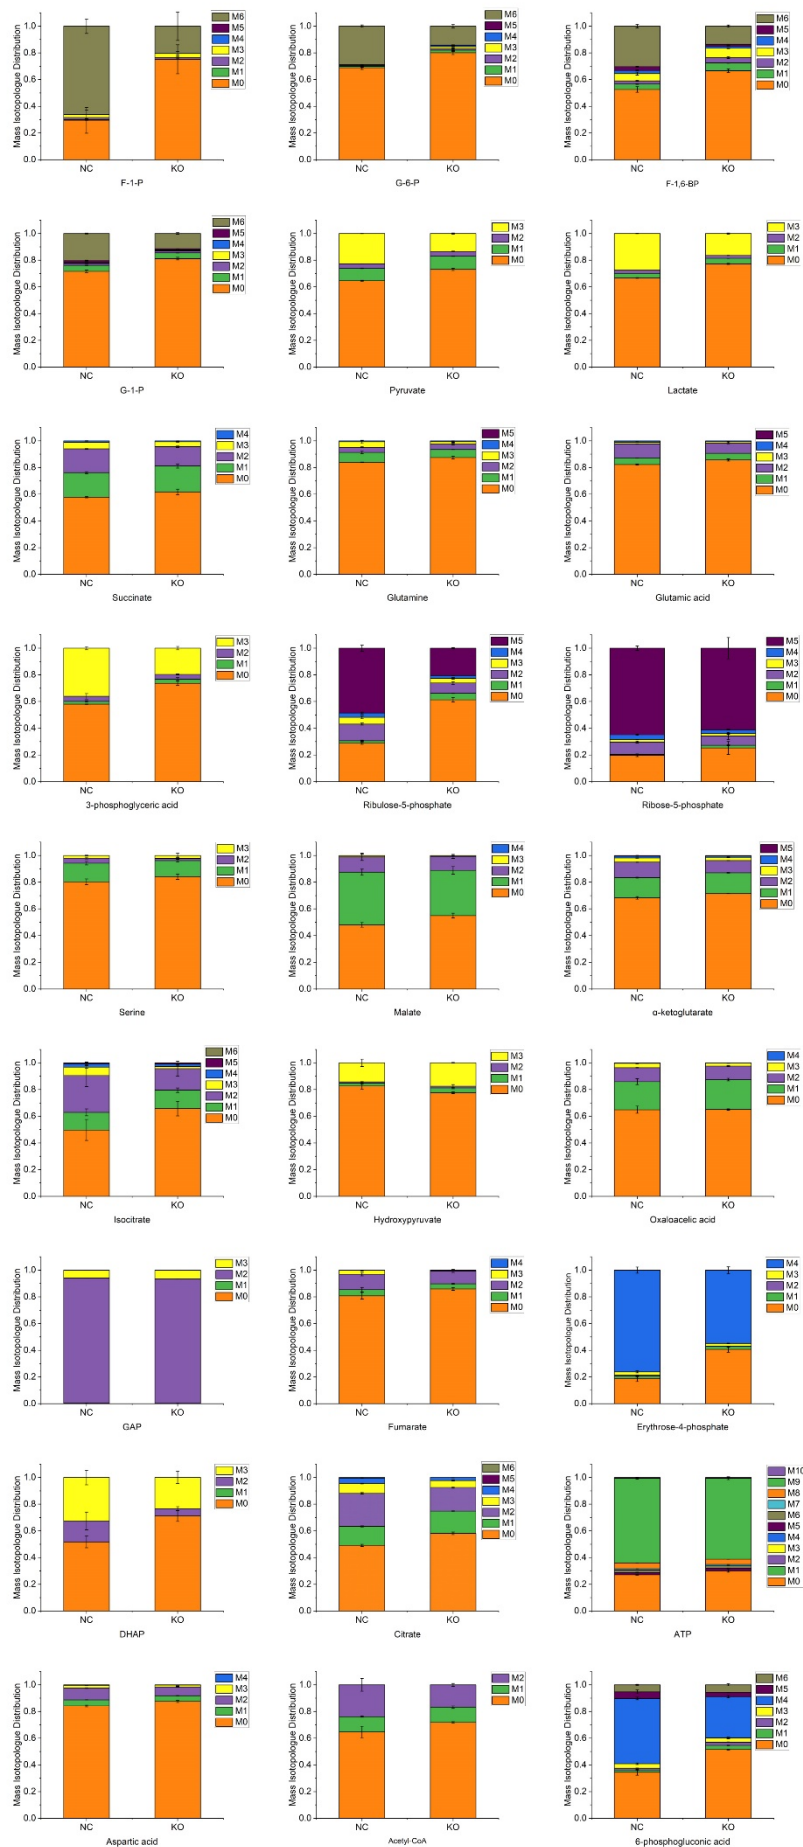

**Extended Data Fig. 4 Mass isotopologue distributions (MIDs) of metabolites in U87 cells**

Mass isotopologue distributions (MIDs) of metabolites in NC and *AKR1B1*-KO in U87 cells were measured after 24 h culture with  $^{13}\text{C}$ -glucose (labelled at all six carbons). The data are displayed as mean  $\pm$  SD (n = 3). Glucose 1-phosphate (G-1-P), Fructose 1-phosphate (F-1-P), Fructose 6-phosphate (F-6-P), Glucose 6-phosphate (G-6-P), Fructose 1,6-bisphosphate (F-1,6-BP), D-Glyceraldehyde 3-phosphate (GAP), Dihydroxyacetone phosphate (DHAP).

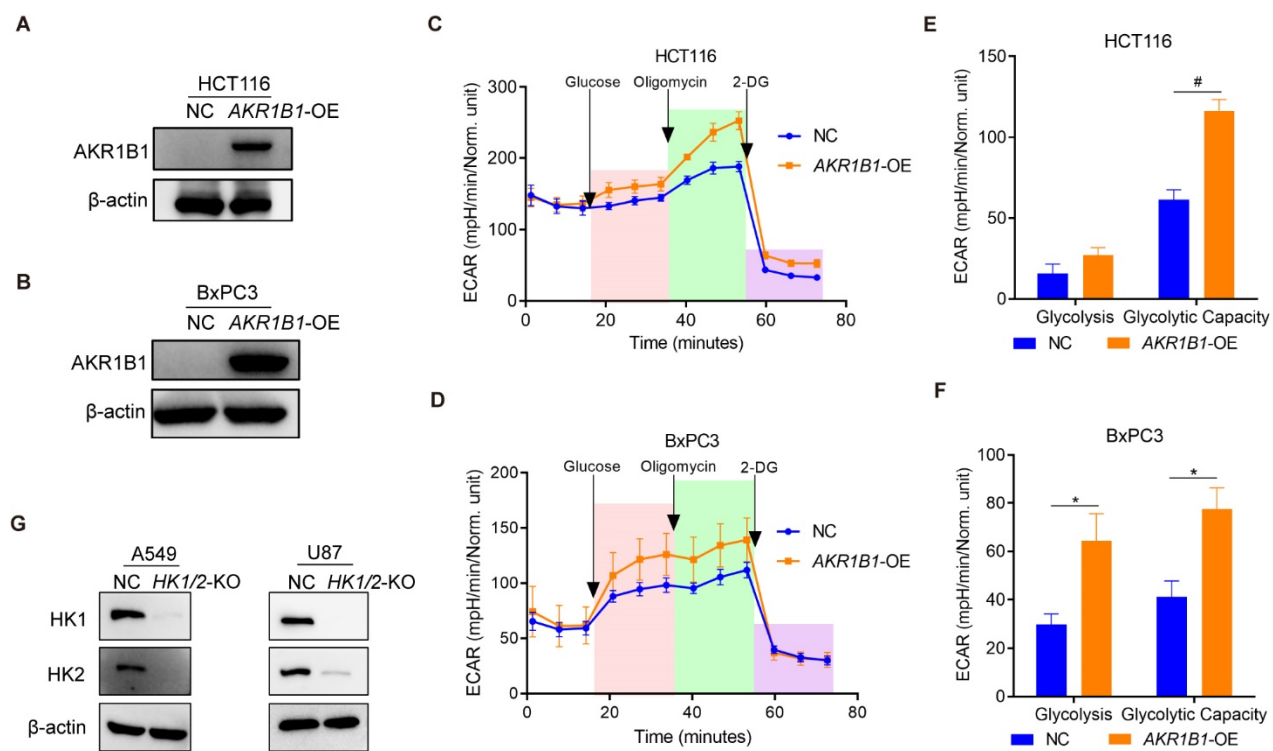

**Extended Data Fig. 5 The glycolysis stress test in NC and *AKR1B1*-OE cells of HCT116 and BxPC3, and protein levels between NC and *HK1/2*-KO cells from A549 and U87.**

(A-B) Homologous recombination technology was used to overexpress *AKR1B1* in cancer cells, resulting in a significant increase in AKR1B1 expression in both HCT116 and BxPC3 cells.

(C-F) The glycolysis stress test revealed the enhanced glycolysis by *AKR1B1*-OE in HCT116 (C, E) and BxPC3 (D, F) (n = 4).

(G) The comparison of HK1 and HK2 protein levels between NC and *HK1/2*-KO cells.

Data are represented as mean  $\pm$  SEM. \*: *t*-test  $P < 0.05$ ; #: *t*-test  $P < 0.01$ .

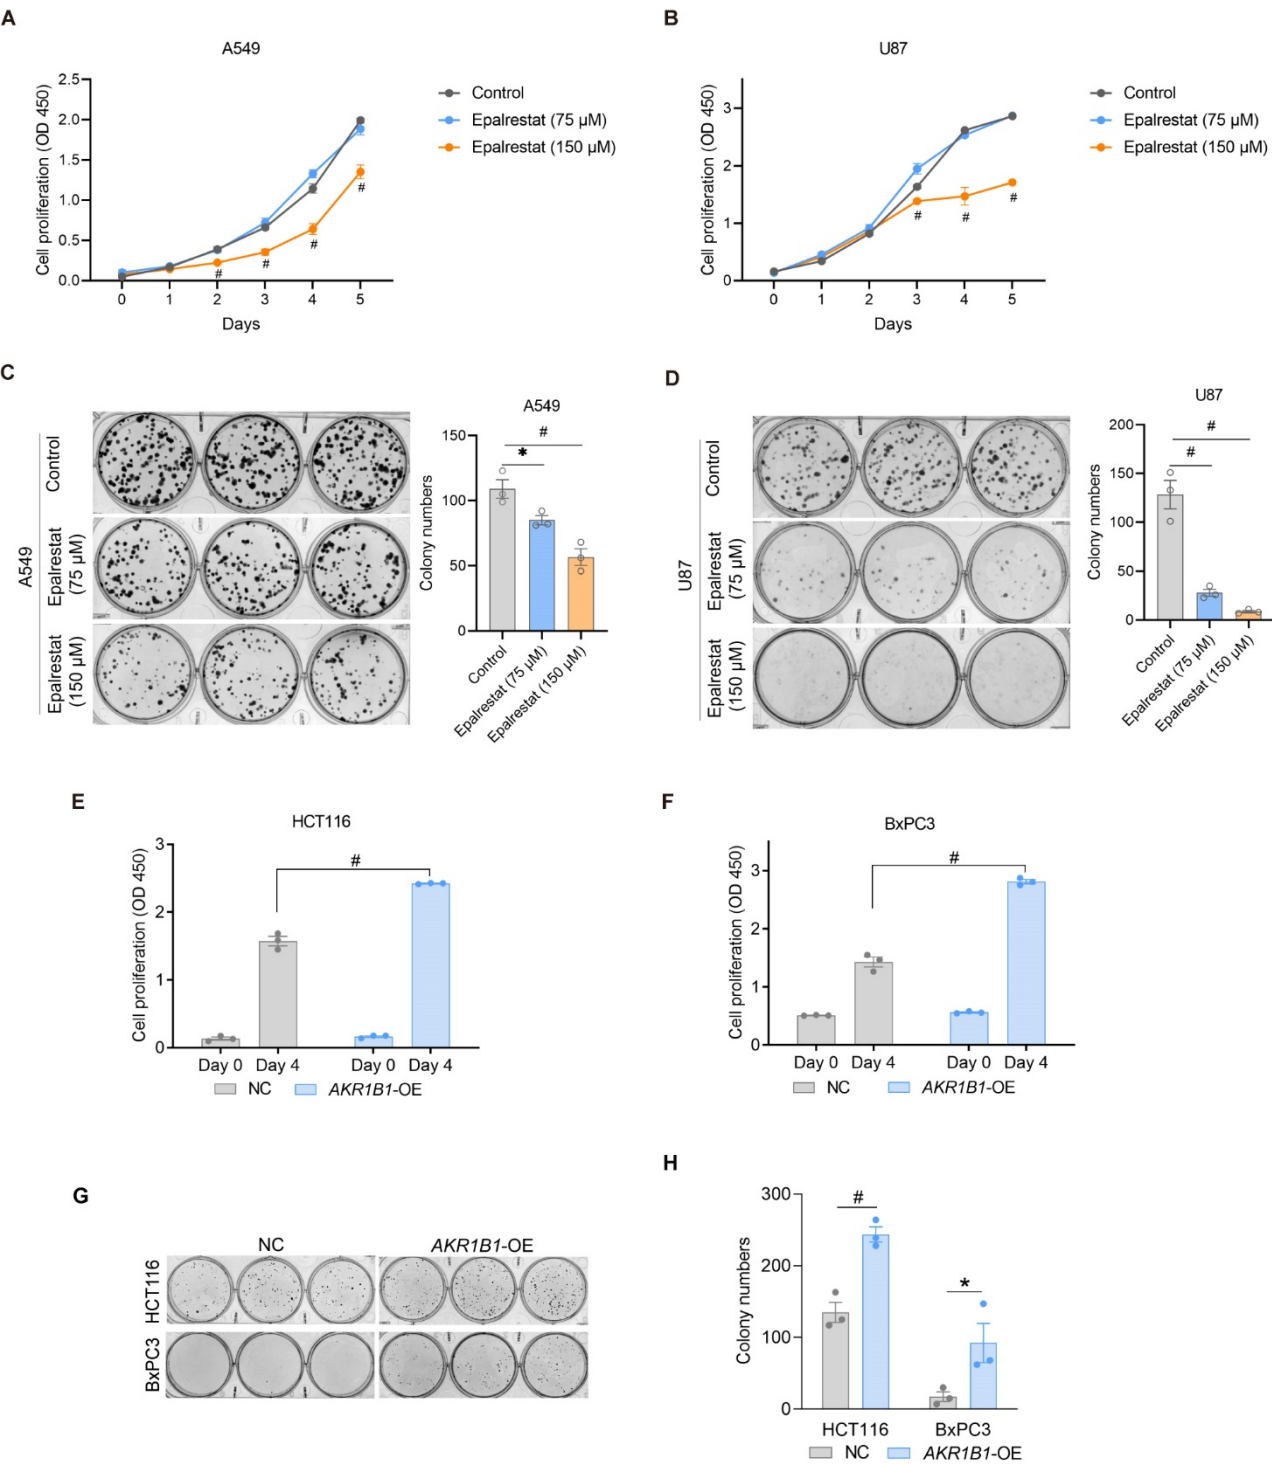

**Extended Data Fig. 6 The effects of epalrestat and *AKR1B1*-OE on cancer cell proliferation and colony formation.**

(A-B) The proliferation of A549 (A) and U87 (B) cells cultured in high glucose DMEM medium containing 10% FBS with or without epalrestat treatment (n = 3).

(C-D) The colony formation of A549 (C) and U87 (D) cells cultured in high glucose DMEM medium containing 20% FBS with or without epalrestat treatment (n = 3).

(E-F) Overexpression of *AKR1B1* accelerated cell proliferation of HCT116 and BxPC3 cells cultured in high glucose DMEM medium containing 10% FBS *in vitro* (n = 3).

(G-H) *AKR1B1*-OE boosted the colony formation of HCT116 and BxPC3 cells *in vitro* (n = 3). Cells were cultured in high glucose DMEM medium containing 20% FBS for 14 days.

Data are represented as mean ± SEM. \*: *t*-test  $P < 0.05$ ; #: *t*-test  $P < 0.01$ .

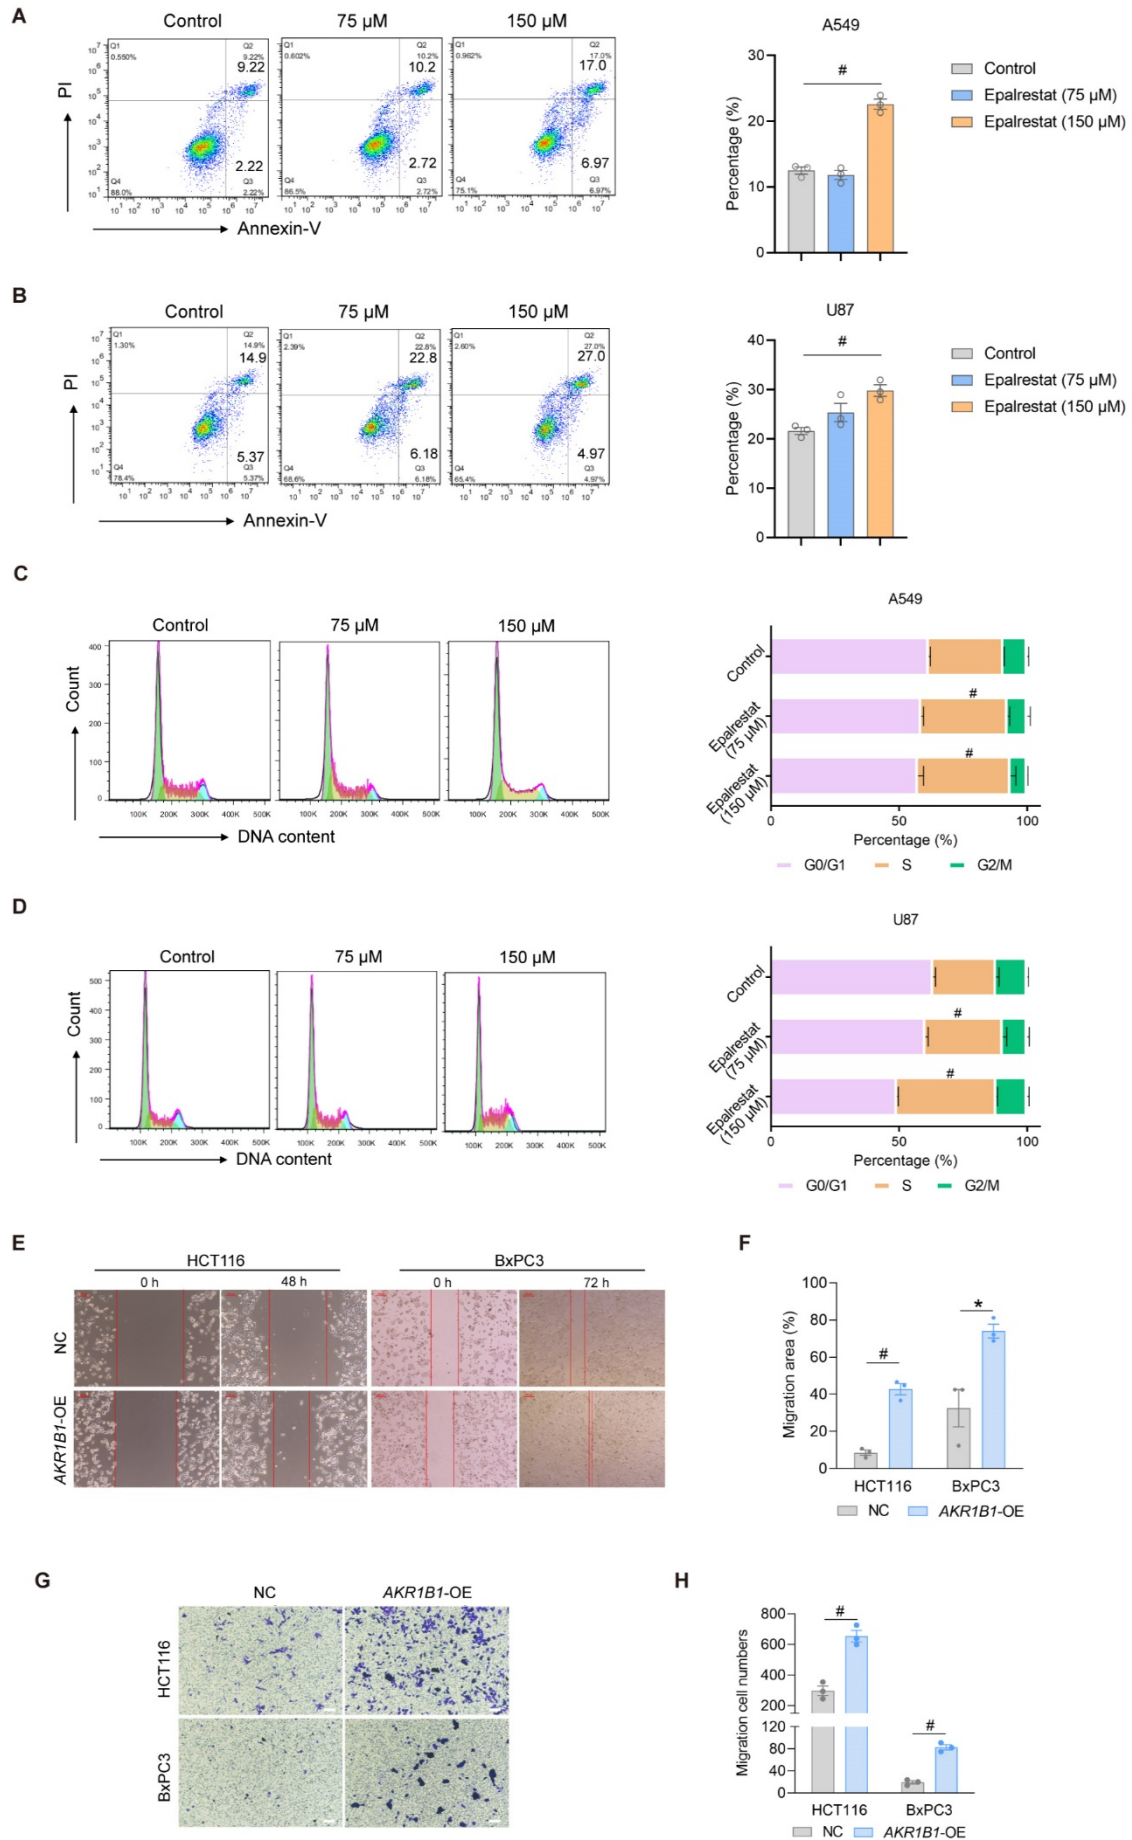

**Extended Data Fig. 7 The effects of epalrestat on cell apoptosis and cell cycle progression in A549 and U87 cells, and the influence of *AKR1B1*-OE on cell migration of HCT116 and BxPC3 cells.**

(A-B) Flow cytometry was used to detect cell apoptosis of A549 (A) and U87 (B) cells cultured in high glucose DMEM medium containing 10% FBS with or without epalrestat treatment (n = 3).

(C-D) Flow cytometry was used to examine cell cycle of A549 (C) and U87 (D) cells, which were cultured in high glucose DMEM medium containing 10% FBS with or without epalrestat treatment (n = 3).

(E-F) *AKR1B1*-OE promoting cell migration of HCT116 and BxPC3 cells in wound healing assay. NC and *AKR1B1*-OE cells were cultured in high glucose DMEM medium containing 2% FBS for wound healing assay (n = 3). Bar plot on the right side showing the quantitative and statistical results.

(G-H) *AKR1B1*-OE fostering cell migration of HCT116 and BxPC3 cells in transwell assay. NC and *AKR1B1*-OE cells were seeded in the upper chambers in high glucose DMEM medium, and the lower chamber was the same medium containing 10% FBS (n = 3). Bar plot on the right side showing the quantitative and statistical results. Scale bar is 100  $\mu$ m.

Data are represented as mean  $\pm$  SEM. \*: *t*-test  $P < 0.05$ ; #: *t*-test  $P < 0.01$ .

115 **Extended Data Table 1.**

116 **Quantification of metabolites using Waters Acquity Xevo TQs**

| Compound                                   | Parent ion | Daughter ion | Cone (V) | CE (V) | RT (min) |
|--------------------------------------------|------------|--------------|----------|--------|----------|
| <sup>13</sup> C <sub>6</sub> -glucose      | 319.9      | 209          | 25       | 10     | 3.21     |
| <sup>13</sup> C <sub>6</sub> -fructose     | 320.0957   | 240.082      | 40       | 10     | 3.67     |
| <sup>13</sup> C <sub>3</sub> -lactate      | 227        | 136.7        | 30       | 20     | 3.22     |
| <sup>13</sup> C <sub>3</sub> -pyruvic acid | 360.6      | 136.8        | 46       | 25     | 8.22     |
| D <sub>7</sub> -glucose                    | 321        | 209.0913     | 48       | 10     | 3.19     |

117

118
